# Supplementary material
Source: PubMed Central journal article supplement (PMC4054180)
Supplement: JB.01688-14_zjb999093181so1.pdf [file JB.01688-14_zjb999093181so1.pdf]

**A proposed genus boundary for the prokaroytes based on  
genomic insights**

Supplemental Figures (Fig. S1 to Fig. S6) and Tables (Table S1, Table S2,  
Table S3) for Online Posting

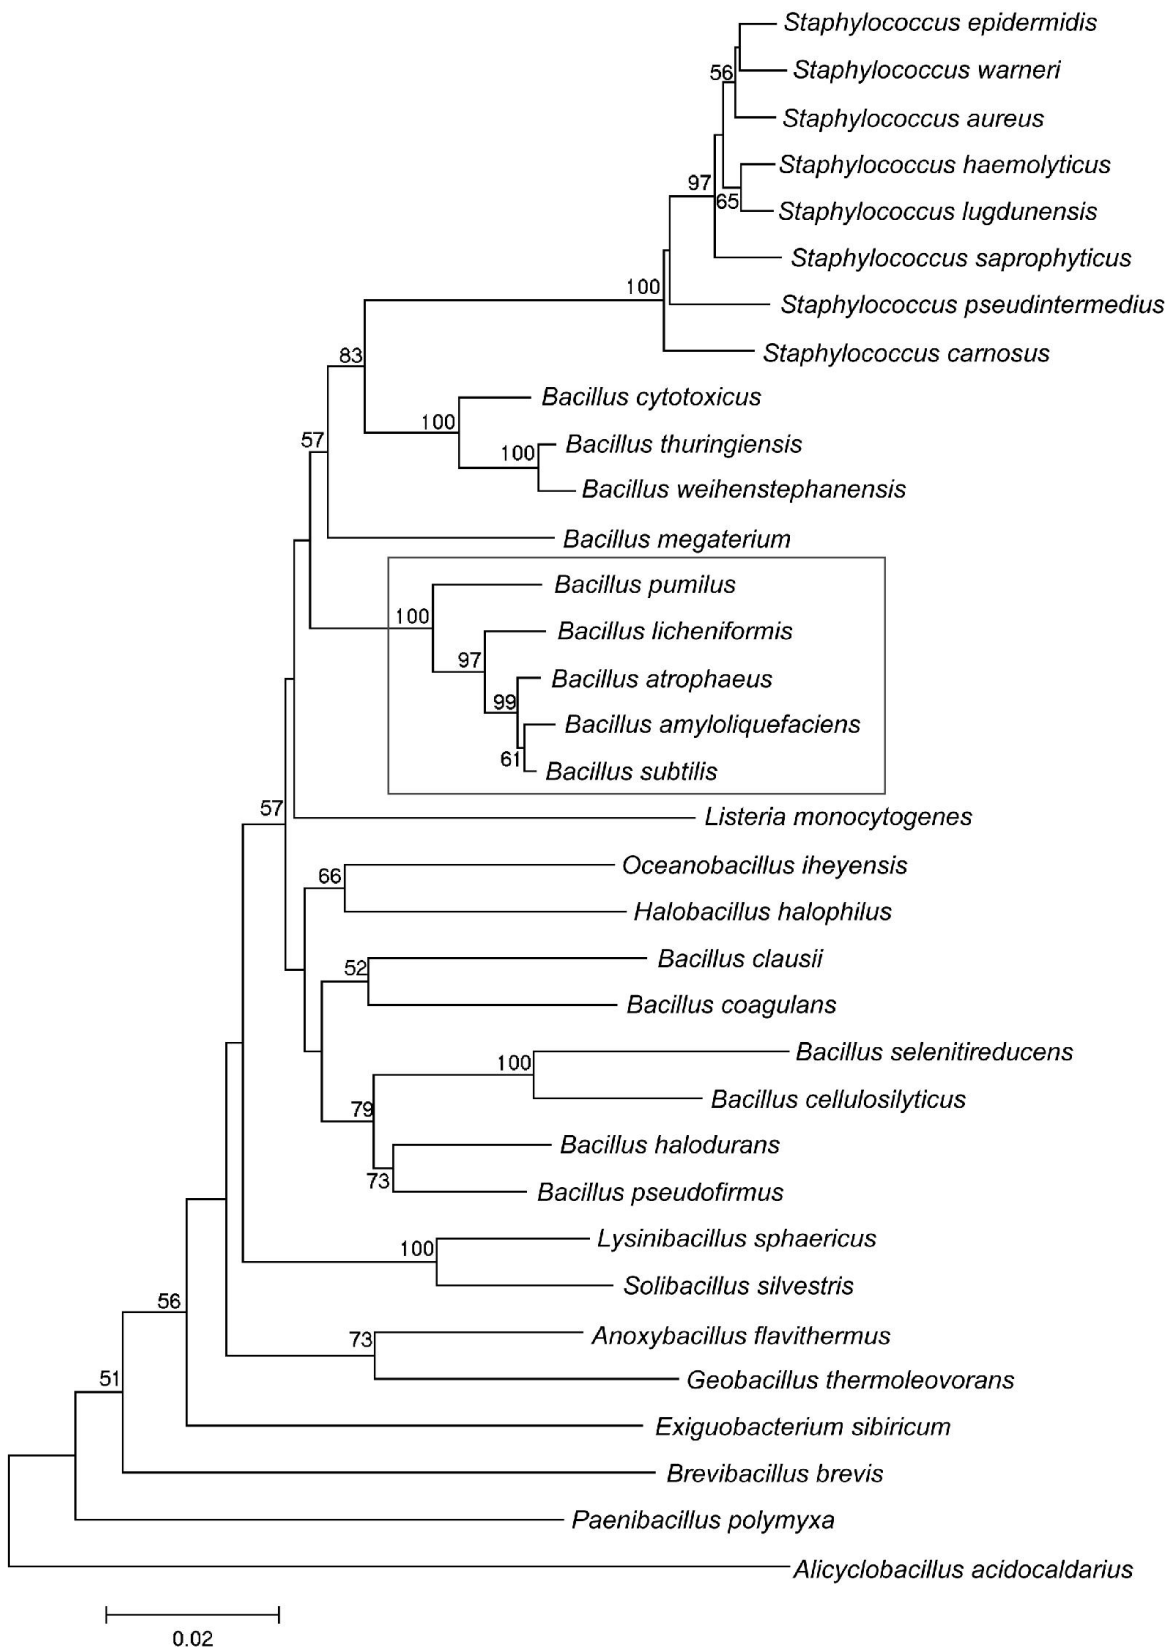

**Fig. S1.** Neighbor-joining phylogenetic tree of the analyzed species belonging to the order *Bacillales* based on 16S rRNA gene sequences. The species in rectangle are retained to represent the genus *Bacillus*.

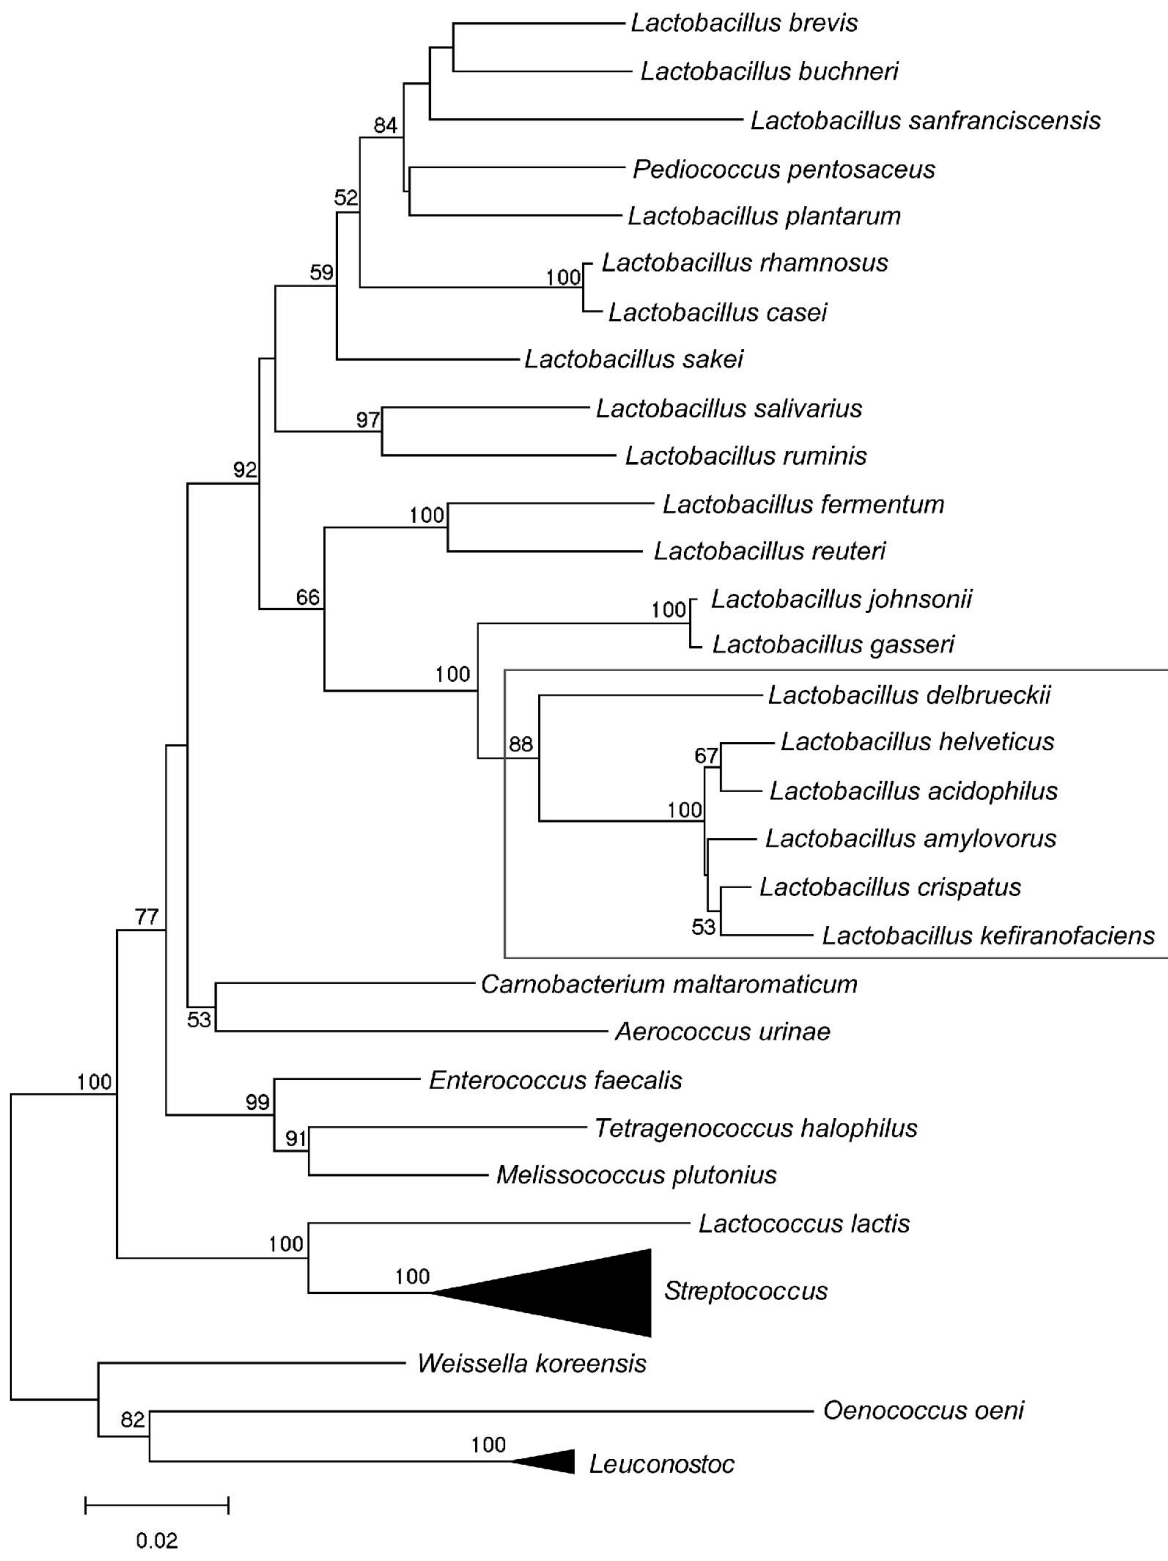

**Fig. S2. Neighbor-joining phylogenetic tree of the analyzed species belonging to the order *Lactobacillales* based on 16S rRNA gene sequences. The species in rectangle are retained to represent the genus *Lactobacillus*.**

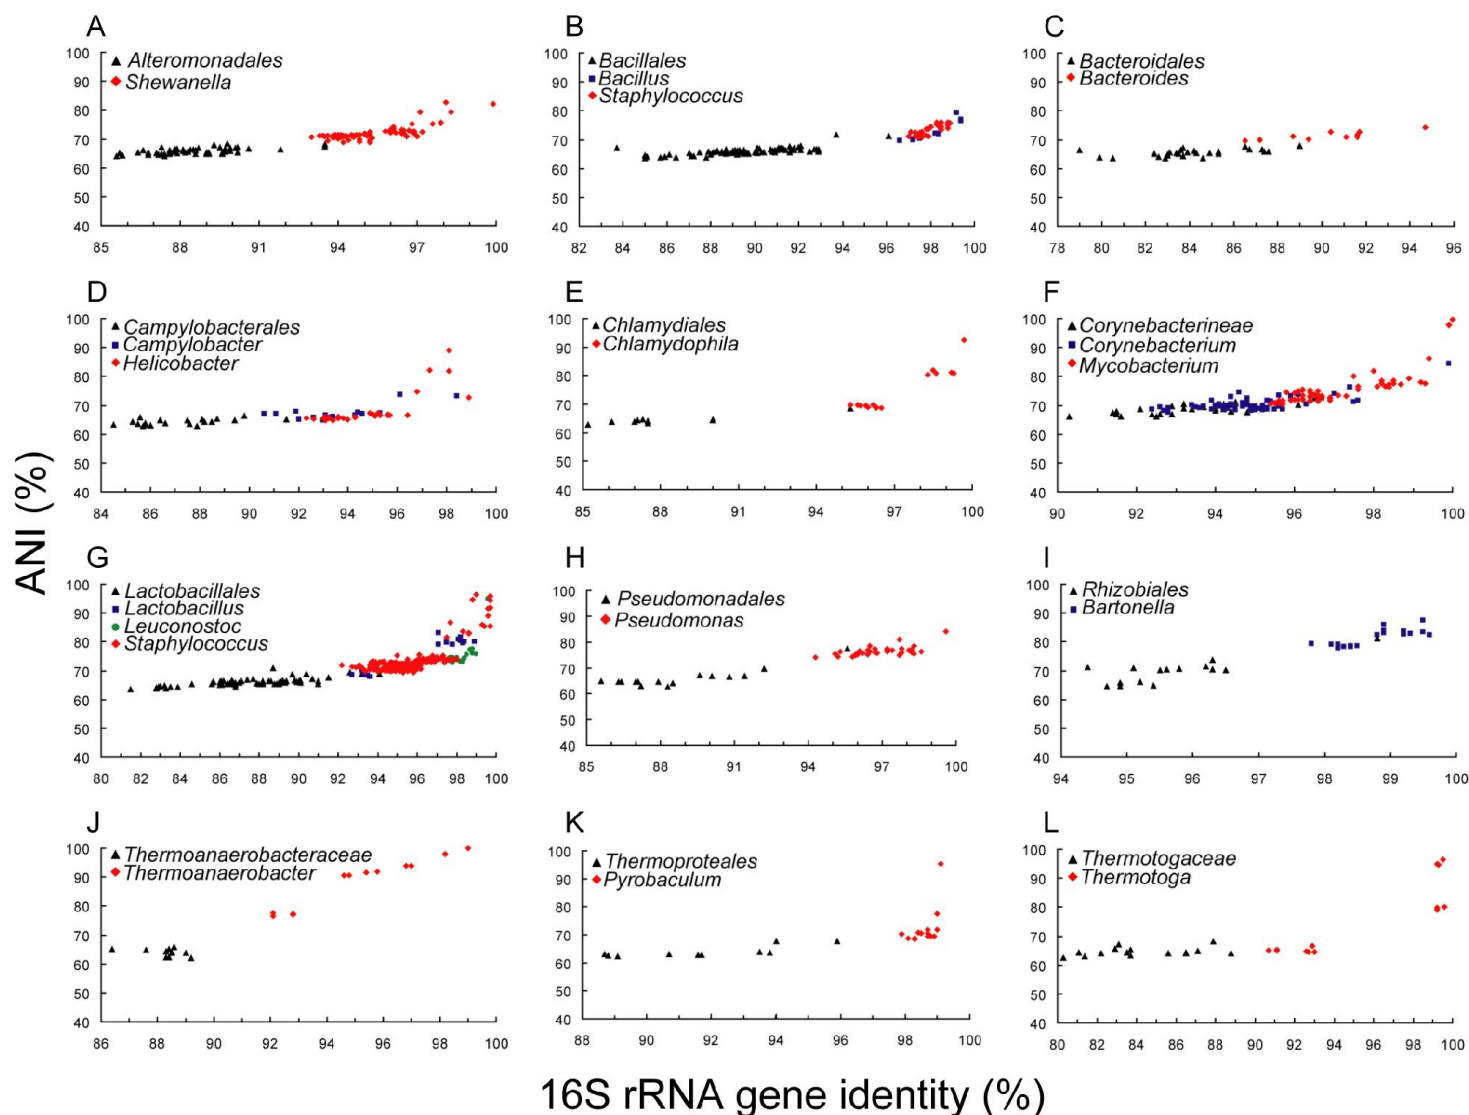

**Fig. S3. Relationships between ANI and 16S rRNA gene identity for pairs of genomes.** Genomes are from the orders *Alteromonadales* (A), *Bacillales* (B), *Bacteroidales* (C), *Campylobacteriales* (D), *Chlamydiales* (E), the suborder *Corynebacterineae* (F), the orders *Lactobacillales* (G), *Pseudomonadales* (H), *Rhizobiales* (I), the family *Thermoanaerobacteraceae* (J), the order *Thermoproteales* (K) and the family *Thermotogaceae* (L). Black triangles represent the inter-genera comparisons in every order/family. Red diamonds and/or blue squares, green circles represent the inter-species comparisons.

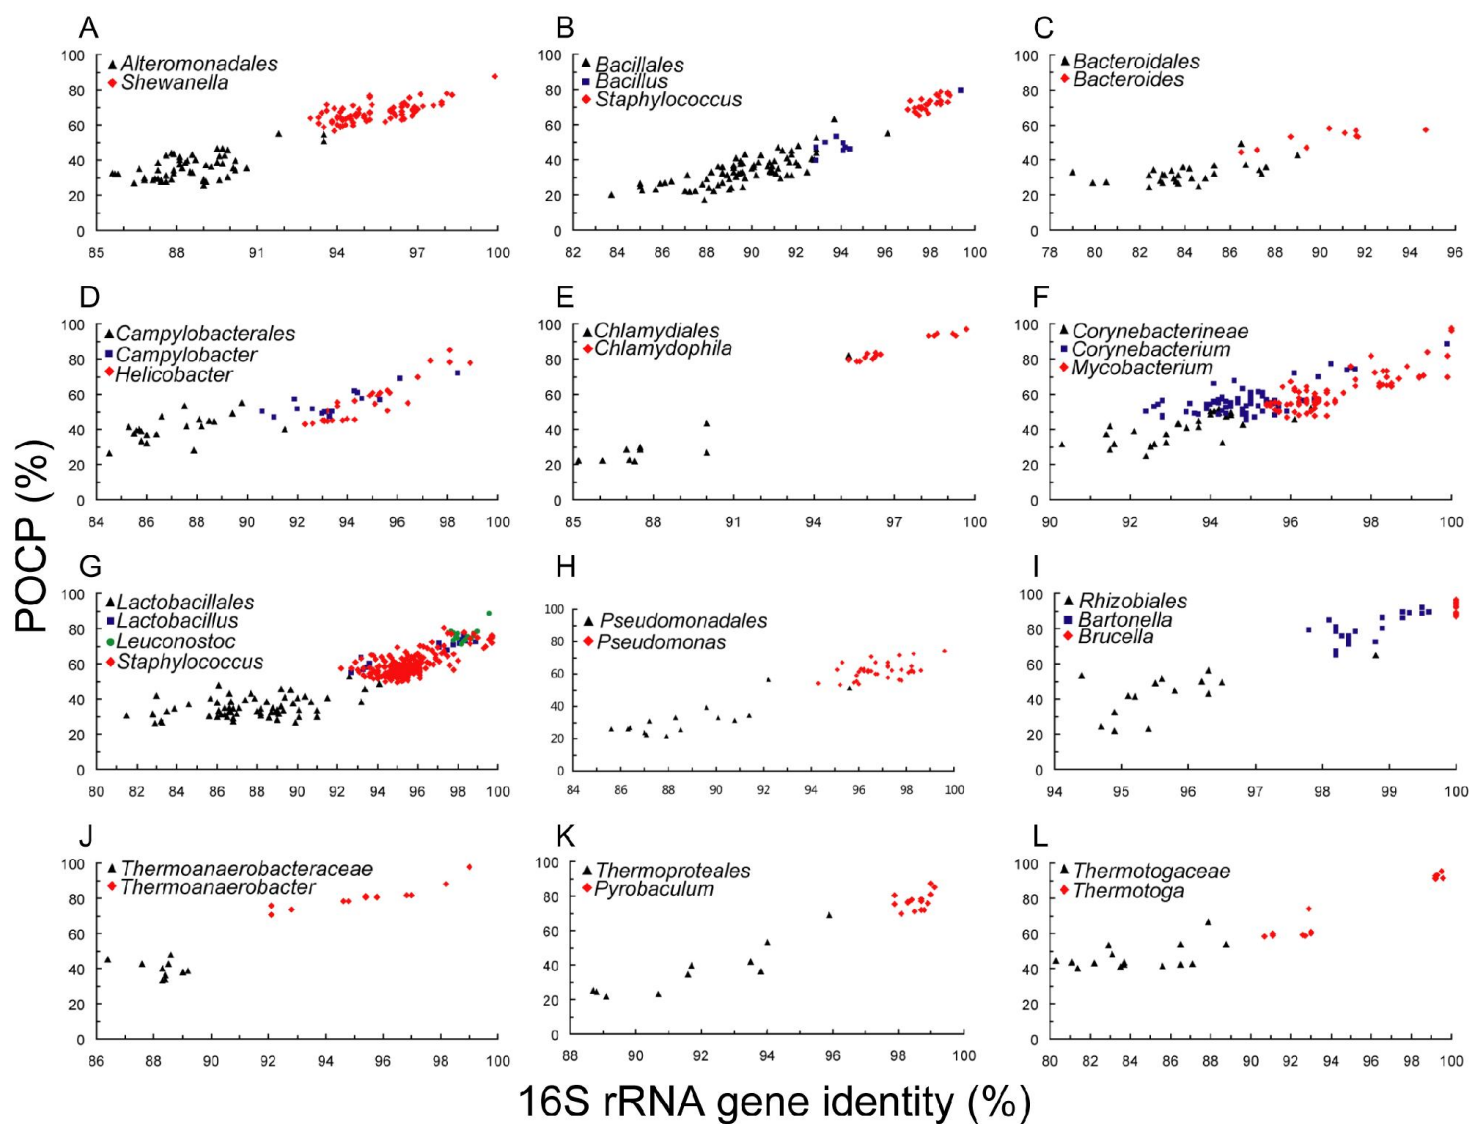

**Fig. S4. Relationships between POCP and 16S rRNA gene identity for pairs of genomes.** The designations of A-L are same to Fig. S3. Black triangles represent the inter-genera comparisons in every order/family. Red diamonds and/or blue squares, green circles represent the inter-species comparisons.

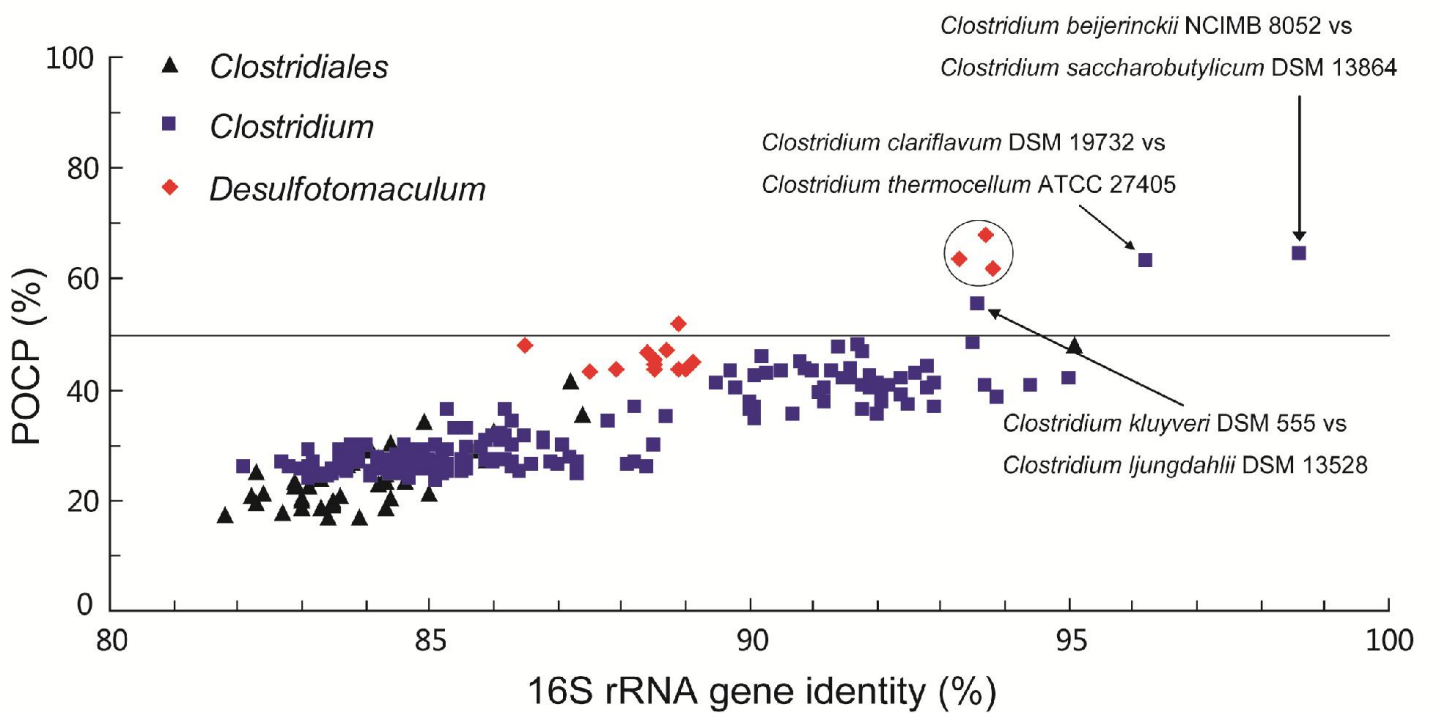

**Fig. S5. Relationships between POCP and 16S rRNA gene identity for pairs of genomes from the order *Clostridiales*.** Black triangles represent the inter-genera comparisons in the order *Clostridiales*. Red diamonds and blue squares represent the inter-species comparisons. The three diamonds in circle represent the comparisons of *D. carboxydivorans*, *D. reducens* and *D. ruminis* of the genus *Desulfotomaculum*.

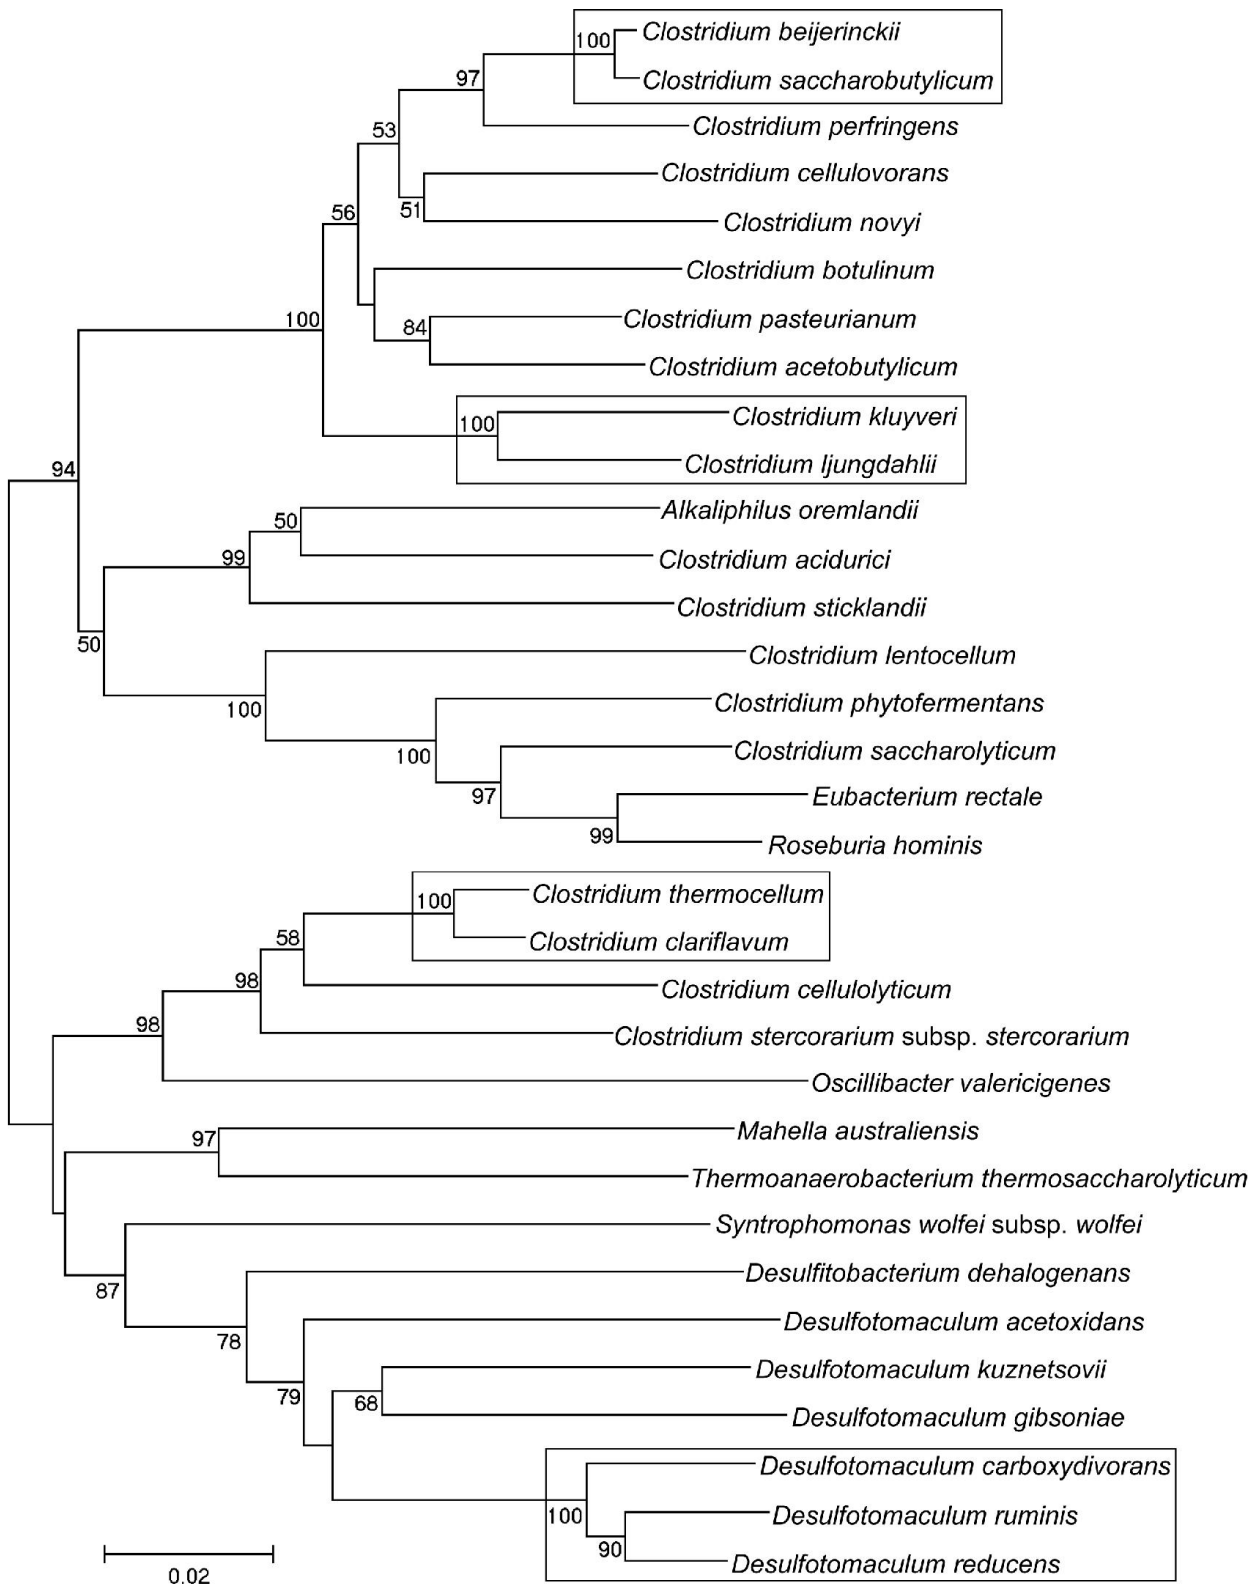

**Fig. S6. Neighbor-joining phylogenetic tree of the analyzed species belonging to the order *Clostridiales* based on 16S rRNA gene sequences. The species in rectangle are within a same genus according to the POCP analyses.**

**Table S1** List of species in this study. For inter-species comparisons, whether the representative stain corresponds to the type strain is indicated (Y: yes; N: no); for inter-genera comparisons, whether the representative species corresponds to the type species is indicated (Y: yes; N: no).

| <b><i>Shewanella</i> Species</b>          | <b>Genome size (Mb)</b> | <b>Type strain</b> | <b>Species from different genera in the order <i>Alteromonadales</i></b>    | <b>Genome size (Mb)</b> | <b>Type species</b> |
|-------------------------------------------|-------------------------|--------------------|-----------------------------------------------------------------------------|-------------------------|---------------------|
| <i>Shewanella amazonensis</i> SB2B        | 4.31                    | Y                  | <i>Alteromonas macleodii</i> ATCC 27126                                     | 4.65                    | Y                   |
| <i>Shewanella baltica</i> OS678           | 5.29                    | N                  | <i>Colwellia psychrerythraea</i> 34H                                        | 5.37                    | Y                   |
| <i>Shewanella denitrificans</i> OS217     | 4.55                    | Y                  | <i>Marinobacter hydrocarbonoclasticus</i> ATCC 49840                        | 3.99                    | Y                   |
| <i>Shewanella frigidimarina</i> NCIMB 400 | 4.85                    | N                  | <i>Ferrimonas balearica</i> DSM 9799                                        | 4.28                    | Y                   |
| <i>Shewanella halifaxensis</i> HAW-EB4    | 5.23                    | Y                  | <i>Glaciecola nitratireducens</i> FR1064                                    | 4.13                    | N                   |
| <i>Shewanella loihica</i> PV-4            | 4.60                    | Y                  | <i>Idiomarina loihiensis</i> L2TR                                           | 2.84                    | N                   |
| <i>Shewanella oneidensis</i> MR-1         | 4.97                    | Y                  | <i>Pseudoalteromonas haloplanktis</i> TAC125                                | 3.85                    | N                   |
| <i>Shewanella pealeana</i> ATCC 700345    | 5.17                    | Y                  | <i>Psychromonas ingrahamii</i> 37                                           | 4.56                    | N                   |
| <i>Shewanella piezotolerans</i> WP3       | 5.40                    | Y                  | <i>Saccharophagus degradans</i> 2-40                                        | 5.06                    | Y                   |
| <i>Shewanella putrefaciens</i> CN-32      | 4.66                    | N                  | <i>Shewanella putrefaciens</i> CN-32                                        | 4.66                    | Y                   |
| <i>Shewanella sediminis</i> HAW-EB3       | 5.52                    | Y                  | <i>Teredinibacter turnerae</i> T7901                                        | 5.19                    | Y                   |
| <i>Shewanella violacea</i> DSS12          | 4.96                    | Y                  |                                                                             |                         |                     |
| <i>Shewanella woodyi</i> ATCC 51908       | 5.94                    | Y                  |                                                                             |                         |                     |
| <b><i>Bacillus</i> Species</b>            | <b>Genome size (Mb)</b> | <b>Type strain</b> | <b>Species from different genera in the order <i>Bacillales</i></b>         | <b>Genome size (Mb)</b> | <b>Type species</b> |
| <i>Bacillus amyloliquefaciens</i> DSM 7   | 4.02                    | Y                  | <i>Alicyclobacillus acidocaldarius</i> subsp. <i>acidocaldarius</i> DSM 446 | 3.02                    | Y                   |



|                                                                            |                         |                    |                                                                 |                         |                     |
|----------------------------------------------------------------------------|-------------------------|--------------------|-----------------------------------------------------------------|-------------------------|---------------------|
| <i>Bacillus atrophaeus</i> 1942                                            | 4.17                    | N                  | <i>Anoxybacillus flavithermus</i> WK1                           | 2.85                    | N                   |
| <i>Bacillus licheniformis</i> ATCC 14580                                   | 4.22                    | Y                  | <i>Brevibacillus brevis</i> NBRC 100599                         | 6.30                    | Y                   |
| <i>Bacillus pumilus</i> SAFR-032                                           | 3.70                    | N                  | <i>Exiguobacterium sibiricum</i> 255-15                         | 3.04                    | N                   |
| <i>Bacillus subtilis</i> subsp. <i>subtilis</i> str. 168                   | 4.22                    | N                  | <i>Geobacillus thermoleovorans</i> CCB_US3_UF5                  | 3.60                    | N                   |
| <b>Staphylococcus Species</b>                                              |                         |                    | <i>Halobacillus halophilus</i> DSM 2266                         | 4.17                    | Y                   |
| <i>Staphylococcus aureus</i> subsp. <i>aureus</i> MRSA252                  | 2.90                    | N                  | <i>Listeria monocytogenes</i> 08-5923                           | 3.00                    | Y                   |
| <i>Staphylococcus carnosus</i> subsp. <i>carnosus</i> TM300                | 2.57                    | N                  | <i>Lysinibacillus sphaericus</i> C3-41                          | 4.82                    | N                   |
| <i>Staphylococcus epidermidis</i> RP62A                                    | 2.64                    | N                  | <i>Oceanobacillus iheyensis</i> HTE831                          | 3.63                    | Y                   |
| <i>Staphylococcus haemolyticus</i> JCSC1435                                | 2.69                    | N                  | <i>Paenibacillus polymyxa</i> M1                                | 6.23                    | Y                   |
| <i>Staphylococcus lugdunensis</i> HKU09-01                                 | 2.66                    | N                  | <i>Solibacillus silvestris</i> StLB046                          | 3.98                    | Y                   |
| <i>Staphylococcus pseudintermedius</i> HKU10-03                            | 2.62                    | N                  | <i>Staphylococcus aureus</i> subsp. <i>aureus</i> 11819-97      | 2.85                    |                     |
| <i>Staphylococcus saprophyticus</i> subsp. <i>saprophyticus</i> ATCC 15305 | 2.52                    | Y                  | <i>Bacillus subtilis</i> subsp. <i>subtilis</i> str. 168        | 4.22                    | Y                   |
| <i>Staphylococcus warneri</i> SG1                                          | 2.49                    | N                  |                                                                 |                         |                     |
| <b>Bacteroides Species</b>                                                 | <b>Genome size (Mb)</b> | <b>Type strain</b> | <b>Species from different genera in the order Bacteroidales</b> | <b>Genome size (Mb)</b> | <b>Type species</b> |
| <i>Bacteroides fragilis</i> NCTC 9343                                      | 5.24                    | Y                  | <i>Alistipes finegoldii</i> DSM 17242                           | 3.73                    | N                   |
| <i>Bacteroides helcogenes</i> P 36-108                                     | 4.00                    | Y                  | <i>Bacteroides fragilis</i> NCTC 9343                           | 5.24                    | Y                   |
| <i>Bacteroides salanitronis</i> DSM 18170                                  | 4.24                    | Y                  | <i>Odoribacter splanchnicus</i> DSM 20712                       | 4.39                    | Y                   |
| <i>Bacteroides thetaiotaomicron</i> VPI-5482                               | 6.26                    | Y                  | <i>Paludibacter propionigenes</i> WB4                           | 3.69                    | Y                   |
| <i>Bacteroides vulgatus</i> ATCC 8482                                      | 5.16                    | Y                  | <i>Parabacteroides distasonis</i> ATCC 8503                     | 4.81                    | Y                   |
|                                                                            |                         |                    | <i>Porphyromonas asaccharolytica</i> DSM 20707                  | 2.19                    | Y                   |
|                                                                            |                         |                    | <i>Tannerella forsythia</i>                                     | 3.41                    | Y                   |

|                                                         |                         |                    |                                                                             |                         |                     |
|---------------------------------------------------------|-------------------------|--------------------|-----------------------------------------------------------------------------|-------------------------|---------------------|
|                                                         |                         |                    | ATCC 43037                                                                  |                         |                     |
|                                                         |                         |                    | <i>Prevotella melaninogenica</i><br>ATCC 25845                              | 3.17                    | Y                   |
| <b><i>Campylobacter</i> Species</b>                     | <b>Genome size (Mb)</b> | <b>Type strain</b> | <b>Species from different genera in the order <i>Campylobacteriales</i></b> | <b>Genome size (Mb)</b> | <b>Type species</b> |
| <i>Campylobacter concisus</i> 13826                     | 2.05                    | N                  | <i>Arcobacter nitrofigilis</i> DSM 7299                                     | 3.19                    | Y                   |
| <i>Campylobacter curvus</i> 525.92                      | 1.97                    | N                  | <i>Wolinella succinogenes</i> DSM 1740                                      | 2.11                    | Y                   |
| <i>Campylobacter fetus</i> subsp. <i>fetus</i> 82-40    | 1.77                    | N                  | <i>Campylobacter fetus</i> subsp. <i>fetus</i> 82-40                        | 1.77                    | Y                   |
| <i>Campylobacter hominis</i> ATCC BAA-381               | 1.71                    | N                  | <i>Helicobacter pylori</i> P12                                              | 1.67                    | Y                   |
| <i>Campylobacter jejuni</i> subsp. <i>doylei</i> 269.97 | 1.85                    | N                  | <i>Sulfurospirillum deleyianum</i> DSM 6946                                 | 2.31                    | Y                   |
| <i>Campylobacter lari</i> RM2100                        | 1.53                    | N                  | <i>Sulfuricurvum kujiense</i> DSM 16994                                     | 2.82                    | Y                   |
| <b><i>Helicobacter</i> Species</b>                      |                         |                    | <i>Sulfurimonas autotrophica</i> DSM 16294                                  | 2.15                    | Y                   |
| <i>Helicobacter acinonychis</i> str. <i>Sheeba</i>      | 1.55                    | N                  |                                                                             |                         |                     |
| <i>Helicobacter bizzozeronii</i> CIII-1                 | 1.76                    | N                  |                                                                             |                         |                     |
| <i>Helicobacter cetorum</i> MIT 99-5656                 | 1.83                    | Y                  |                                                                             |                         |                     |
| <i>Helicobacter felis</i> ATCC 49179                    | 1.67                    | Y                  |                                                                             |                         |                     |
| <i>Helicobacter hepaticus</i> ATCC 51449                | 1.80                    | N                  |                                                                             |                         |                     |
| <i>Helicobacter mustelae</i> 12198                      | 1.58                    | Y                  |                                                                             |                         |                     |
| <i>Helicobacter pylori</i> P12                          | 1.67                    | N                  |                                                                             |                         |                     |
| <i>Helicobacter cinaedi</i> PAGU611                     | 2.08                    | N                  |                                                                             |                         |                     |
| <b><i>Chlamydophila</i> Species</b>                     | <b>Genome size (Mb)</b> | <b>Type strain</b> | <b>Species from different genera in the order <i>Chlamydiales</i></b>       | <b>Genome size (Mb)</b> | <b>Type species</b> |
| <i>Chlamydophila abortus</i> S26/3                      | 1.14                    | N                  | <i>Chlamydia trachomatis</i> A/HAR-13                                       | 1.04                    | Y                   |
| <i>Chlamydophila caviae</i> GPIC                        | 1.17                    | Y                  | <i>Chlamydophila psittaci</i> 6BC                                           | 1.17                    | Y                   |
| <i>Chlamydophila felis</i> Fe/C-56                      | 1.17                    | N                  | <i>Parachlamydia acanthamoebae</i> UV-7                                     | 3.07                    | Y                   |

|                                                                           |                         |                    |                                                                          |                         |                     |
|---------------------------------------------------------------------------|-------------------------|--------------------|--------------------------------------------------------------------------|-------------------------|---------------------|
| <i>Chlamydophila pecorum</i> E58                                          | 1.11                    | Y                  | <i>Simkania negevensis</i> Z                                             | 2.63                    | Y                   |
| <i>Chlamydophila pneumoniae</i><br>TW-183                                 | 1.23                    | Y                  | <i>Waddlia chondrophila</i><br>WSU 86-1044                               | 2.12                    | Y                   |
| <i>Chlamydophila psittaci</i> 6BC                                         | 1.17                    | Y                  |                                                                          |                         |                     |
| <b><i>Lactobacillus</i> Species</b>                                       | <b>Genome size (Mb)</b> | <b>Type strain</b> | <b>Species from different genera in the order <i>Lactobacillales</i></b> | <b>Genome size (Mb)</b> | <b>Type species</b> |
| <i>Lactobacillus acidophilus</i><br>NCFM                                  | 1.99                    | N                  | <i>Aerococcus urinae</i><br>ACS-120-V-Col10a                             | 2.08                    | N                   |
| <i>Lactobacillus amylovorus</i><br>GRL 1112                               | 2.12                    | N                  | <i>Carnobacterium maltaromaticum</i> LMA28                               | 3.65                    | N                   |
| <i>Lactobacillus crispatus</i> ST1                                        | 2.04                    | N                  | <i>Tetragenococcus halophilus</i> NBRC 12172                             | 2.56                    | Y                   |
| <i>Lactobacillus delbrueckii</i><br>subsp. <i>bulgaricus</i> ATCC 11842   | 1.86                    | Y                  | <i>Enterococcus faecalis</i><br>OG1RF                                    | 2.74                    | Y                   |
| <i>Lactobacillus helveticus</i> DPC 4571                                  | 2.08                    | N                  | <i>Melissococcus plutonius</i><br>ATCC 35311                             | 2.07                    | Y                   |
| <i>Lactobacillus kefiranofaciens</i><br>ZW3                               | 2.35                    | N                  | <i>Weissella koreensis</i> KACC 15510                                    | 1.44                    | N                   |
| <b><i>Leuconostoc</i> Species</b>                                         |                         |                    | <i>Pediococcus pentosaceus</i><br>ATCC 25745                             | 1.83                    | N                   |
| <i>Leuconostoc carnosum</i> JB16                                          | 1.73                    | N                  | <i>Oenococcus oeni</i> PSU-1                                             | 1.78                    | Y                   |
| <i>Leuconostoc citreum</i> KM20                                           | 1.84                    | N                  | <i>Lactococcus lactis</i> subsp. <i>lactis</i> IO-1                      | 2.42                    | Y                   |
| <i>Leuconostoc gasicomitatum</i><br>LMG 18811                             | 1.95                    | Y                  | <i>Lactobacillus delbrueckii</i><br>subsp. <i>bulgaricus</i> ATCC 11842  | 1.86                    | Y                   |
| <i>Leuconostoc gelidum</i> JB7                                            | 1.89                    | N                  | <i>Streptococcus pyogenes</i><br>MGAS10750                               | 1.94                    | Y                   |
| <i>Leuconostoc kimchii</i> IMSNU 11154                                    | 2.11                    | N                  | <i>Leuconostoc mesenteroides</i> subsp. <i>mesenteroides</i> ATCC 8293   | 2.07                    | Y                   |
| <i>Leuconostoc mesenteroides</i><br>subsp. <i>mesenteroides</i> ATCC 8293 | 2.07                    | Y                  |                                                                          |                         |                     |
| <b><i>Streptococcus</i> Species</b>                                       |                         |                    |                                                                          |                         |                     |
| <i>Streptococcus agalactiae</i><br>NEM316                                 | 2.21                    | N                  |                                                                          |                         |                     |
| <i>Streptococcus dysgalactiae</i><br>subsp. <i>equisimilis</i> GGS_124    | 2.11                    | N                  |                                                                          |                         |                     |
| <i>Streptococcus equi</i> subsp. <i>equi</i> 4047                         | 2.25                    | N                  |                                                                          |                         |                     |
| <i>Streptococcus gallolyticus</i>                                         | 2.36                    | N                  |                                                                          |                         |                     |

|                                                                       |                         |                    |                                                                          |                         |                     |
|-----------------------------------------------------------------------|-------------------------|--------------------|--------------------------------------------------------------------------|-------------------------|---------------------|
| subsp. <i>gallolyticus</i> ATCC BAA-2069                              |                         |                    |                                                                          |                         |                     |
| <i>Streptococcus gordonii</i> str. Challis subsp. CH1                 | 2.20                    | N                  |                                                                          |                         |                     |
| <i>Streptococcus infantarius</i> subsp. <i>infantarius</i> CJ18       | 1.99                    | N                  |                                                                          |                         |                     |
| <i>Streptococcus intermedius</i> JTH08                                | 1.93                    | N                  |                                                                          |                         |                     |
| <i>Streptococcus macedonicus</i> ACA-DC 198                           | 2.13                    | N                  |                                                                          |                         |                     |
| <i>Streptococcus mitis</i> B6                                         | 2.15                    | N                  |                                                                          |                         |                     |
| <i>Streptococcus mutans</i> UA159                                     | 2.03                    | N                  |                                                                          |                         |                     |
| <i>Streptococcus oralis</i> Uo5                                       | 1.96                    | N                  |                                                                          |                         |                     |
| <i>Streptococcus parasanguinis</i> ATCC 15912                         | 2.15                    | Y                  |                                                                          |                         |                     |
| <i>Streptococcus parauberis</i> KCTC 11537                            | 2.14                    | N                  |                                                                          |                         |                     |
| <i>Streptococcus pasteurianus</i> ATCC 43144                          | 2.10                    | N                  |                                                                          |                         |                     |
| <i>Streptococcus pneumoniae</i> Hungary19A-6                          | 2.25                    | N                  |                                                                          |                         |                     |
| <i>Streptococcus pseudopneumoniae</i> IS7493                          | 2.19                    | N                  |                                                                          |                         |                     |
| <i>Streptococcus pyogenes</i> MGAS10750                               | 1.94                    | N                  |                                                                          |                         |                     |
| <i>Streptococcus salivarius</i> CCHSS3                                | 2.22                    | N                  |                                                                          |                         |                     |
| <i>Streptococcus sanguinis</i> SK36                                   | 2.39                    | N                  |                                                                          |                         |                     |
| <i>Streptococcus suis</i> S735                                        | 1.98                    | Y                  |                                                                          |                         |                     |
| <i>Streptococcus thermophilus</i> LMD-9                               | 1.87                    | N                  |                                                                          |                         |                     |
| <i>Streptococcus uberis</i> 0140J                                     | 1.85                    | N                  |                                                                          |                         |                     |
| <b><i>Pseudomonas</i> Species</b>                                     | <b>Genome size (Mb)</b> | <b>Type strain</b> | <b>Species from different genera in the order <i>Pseudomonadales</i></b> | <b>Genome size (Mb)</b> | <b>Type species</b> |
| <i>Pseudomonas aeruginosa</i> LESB58                                  | 6.60                    | N                  | <i>Acinetobacter calcoaceticus</i> PHEA-2                                | 3.86                    | Y                   |
| <i>Pseudomonas brassicacearum</i> subsp. <i>brassicacearum</i> NFM421 | 6.84                    | N                  | <i>Azotobacter vinelandii</i> DJ                                         | 5.37                    | N                   |
| <i>Pseudomonas entomophila</i> L48                                    | 5.89                    | Y                  | <i>Cellvibrio japonicus</i> Ueda107                                      | 4.58                    | N                   |

|                                                                     |                         |                    |                                                                                   |                         |                     |
|---------------------------------------------------------------------|-------------------------|--------------------|-----------------------------------------------------------------------------------|-------------------------|---------------------|
| <i>Pseudomonas fluorescens</i> Pf-5                                 | 7.07                    | N                  | <i>Moraxella catarrhalis</i> RH4                                                  | 1.86                    | N                   |
| <i>Pseudomonas fulva</i> 12-X                                       | 4.92                    | N                  | <i>Psychrobacter arcticus</i> 273-4                                               | 2.65                    | N                   |
| <i>Pseudomonas mendocina</i> NK-01                                  | 5.43                    | N                  | <i>Pseudomonas aeruginosa</i> LESB58                                              | 6.60                    | Y                   |
| <i>Pseudomonas putida</i> KT2440                                    | 6.18                    | N                  |                                                                                   |                         |                     |
| <i>Pseudomonas stutzeri</i> A1501                                   | 4.57                    | N                  |                                                                                   |                         |                     |
| <i>Pseudomonas syringae</i> pv. tomato str. DC3000                  | 6.54                    | N                  |                                                                                   |                         |                     |
| <b><i>Bartonella</i> Species</b>                                    | <b>Genome size (Mb)</b> | <b>Type strain</b> | <b>Species from different genera in the order <i>Rhizobiales</i></b>              | <b>Genome size (Mb)</b> | <b>Type species</b> |
| <i>Bartonella bacilliformis</i> KC583                               | 1.45                    | Y                  | <i>Bartonella bacilliformis</i> KC583                                             | 1.45                    | Y                   |
| <i>Bartonella clarridgeiae</i> 73                                   | 1.52                    | N                  | <i>Brucella melitensis</i> ATCC 23457                                             | 3.31                    | Y                   |
| <i>Bartonella grahamii</i> as4aup                                   | 2.35                    | N                  | <i>Mesorhizobium loti</i> MAFF303099                                              | 7.60                    | Y                   |
| <i>Bartonella henselae</i> str. Houston-1                           | 1.93                    | Y                  | <i>Ochrobactrum anthropi</i> ATCC 49188                                           | 5.06                    | Y                   |
| <i>Bartonella quintana</i> str. Toulouse                            | 1.58                    | N                  | <i>Rhizobium tropici</i> CIAT 899                                                 | 6.69                    | N                   |
| <i>Bartonella tribocorum</i> CIP 105476                             | 2.62                    | Y                  | <i>Sinorhizobium fredii</i> USDA 257                                              | 6.89                    | Y                   |
| <i>Bartonella vinsonii</i> subsp. <i>berkhoffii</i> str. Winnie     | 1.80                    | N                  |                                                                                   |                         |                     |
| <b><i>Thermoanaerobacter</i> Species</b>                            | <b>Genome size (Mb)</b> | <b>Type strain</b> | <b>Species from different genera in the family <i>Thermoanaerobacteraceae</i></b> | <b>Genome size (Mb)</b> | <b>Type species</b> |
| <i>Thermoanaerobacter brockii</i> subsp. <i>finnii</i> Ako-1        | 2.34                    | Y                  | <i>Ammonifex degensii</i> KC4                                                     | 2.13                    | Y                   |
| <i>Thermoanaerobacter italicus</i> Ab9                              | 2.45                    | Y                  | <i>Carboxydotherrmus hydrogenoformans</i> Z-2901                                  | 2.40                    | Y                   |
| <i>Thermoanaerobacter mathranii</i> subsp. <i>mathranii</i> str. A3 | 2.31                    | Y                  | <i>Thermacetogenium phaeum</i> DSM 12270                                          | 2,94                    | Y                   |
| <i>Thermoanaerobacter pseudethanolicus</i> ATCC 33223               | 2.36                    | Y                  | <i>Moorella thermoacetica</i> ATCC 39073                                          | 2.63                    | Y                   |
| <i>Thermoanaerobacter tengcongensis</i> MB4                         | 2.69                    | Y                  | <i>Thermoanaerobacter italicus</i> Ab9                                            | 2.45                    | N                   |
| <i>Thermoanaerobacter wiegelii</i>                                  | 2.79                    | Y                  |                                                                                   |                         |                     |

|                                                |                         |                    |                                                                               |                         |                     |
|------------------------------------------------|-------------------------|--------------------|-------------------------------------------------------------------------------|-------------------------|---------------------|
| Rt8.B1                                         |                         |                    |                                                                               |                         |                     |
| <b><i>Pyrobaculum</i> Species</b>              | <b>Genome size (Mb)</b> | <b>Type strain</b> | <b>Species from different genera in the order <i>Thermoproteales</i></b>      | <b>Genome size (Mb)</b> | <b>Type species</b> |
| <i>Pyrobaculum aerophilum</i> str. IM2         | 2.22                    | Y                  | <i>Caldivirga maquilingensis</i> IC-167                                       | 2.08                    | Y                   |
| <i>Pyrobaculum arsenaticum</i> DSM 13514       | 2.12                    | Y                  | <i>Pyrobaculum islandicum</i> DSM 4184                                        | 1.83                    | Y                   |
| <i>Pyrobaculum calidifontis</i> JCM 11548      | 2.01                    | Y                  | <i>Thermofilum pendens</i> Hrk 5                                              | 1.78                    | Y                   |
| <i>Pyrobaculum islandicum</i> DSM 4184         | 1.83                    | Y                  | <i>Thermoproteus tenax</i> Kra 1                                              | 1.84                    | Y                   |
| <i>Pyrobaculum oguniense</i> TE7               | 2.44                    | Y                  | <i>Vulcanisaeta distributa</i> DSM 14429                                      | 2.37                    | Y                   |
| <i>Pyrobaculum neutrophilum</i> V24Sta         | 1.77                    | Y                  |                                                                               |                         |                     |
| <b><i>Thermotoga</i> Species</b>               | <b>Genome size (Mb)</b> | <b>Type strain</b> | <b>Species from different genera in the family <i>Thermotogaceae</i></b>      | <b>Genome size (Mb)</b> | <b>Type species</b> |
| <i>Thermotoga lettingae</i> TMO                | 2.14                    | Y                  | <i>Fervidobacterium nodosum</i> Rt17-B1                                       | 1.95                    | Y                   |
| <i>Thermotoga maritima</i> MSB8                | 1.86                    | Y                  | <i>Kosmotoga olearia</i> TBF 19.5.1                                           | 2.30                    | Y                   |
| <i>Thermotoga naphthophila</i> RKU-10          | 1.81                    | Y                  | <i>Marinitoga piezophila</i> KA3                                              | 2.23                    | N                   |
| <i>Thermotoga neapolitana</i> DSM 4359         | 1.88                    | Y                  | <i>Petrotoga mobilis</i> SJ95                                                 | 2.17                    | Y                   |
| <i>Thermotoga petrophila</i> RKU-1             | 1.82                    | Y                  | <i>Thermosipho africanus</i> TCF52B                                           | 2.02                    | Y                   |
| <i>Thermotoga thermarum</i> DSM 5069           | 2.04                    | Y                  | <i>Thermotoga maritima</i> MSB8                                               | 1.86                    | Y                   |
| <b><i>Corynebacterium</i> Species</b>          | <b>Genome size (Mb)</b> | <b>Type strain</b> | <b>Species from different genera in the suborder <i>Corynebacterineae</i></b> | <b>Genome size (Mb)</b> | <b>Type species</b> |
| <i>Corynebacterium aurimucosum</i> ATCC 700975 | 2.82                    | N                  | <i>Amycolicococcus subflavus</i> DQS3-9A1                                     | 4.74                    | Y                   |
| <i>Corynebacterium diphtheriae</i> 31A         | 2.54                    | N                  | <i>Corynebacterium diphtheriae</i> 31A                                        | 2.54                    | Y                   |
| <i>Corynebacterium efficiens</i> YS-314        | 3.22                    | Y                  | <i>Gordonia bronchialis</i> DSM 43247                                         | 5.29                    | Y                   |
| <i>Corynebacterium glutamicum</i> ATCC 13032   | 3.36                    | Y                  | <i>Mycobacterium tuberculosis</i> H37Rv                                       | 4.41                    | Y                   |
| <i>Corynebacterium jeikeium</i> K411           | 2.48                    | N                  | <i>Nocardia cyriacigeorgica</i> GUH-2                                         | 6.19                    | N                   |

|                                                           |      |   |                                             |      |   |
|-----------------------------------------------------------|------|---|---------------------------------------------|------|---|
| <i>Corynebacterium kropsenstedtii</i> DSM 44385           | 2.45 | Y | <i>Rhodococcus opacus</i> B4                | 8.73 | N |
| <i>Corynebacterium pseudotuberculosis</i> FRC41           | 2.34 | N | <i>Segniliparus rotundus</i> DSM 44985      | 3.16 | Y |
| <i>Corynebacterium resistens</i> DSM 45100                | 2.60 | Y | <i>Tsukamurella paurometabola</i> DSM 20162 | 4.48 | Y |
| <i>Corynebacterium ulcerans</i> BR-AD22                   | 2.61 | N |                                             |      |   |
| <i>Corynebacterium urealyticum</i> DSM 7109               | 2.37 | Y |                                             |      |   |
| <i>Corynebacterium variabile</i> DSM 44702                | 3.43 | N |                                             |      |   |
| <i>Corynebacterium halotolerans</i> DSM 44683             | 3.14 | Y |                                             |      |   |
| <b><i>Mycobacterium</i> Species</b>                       |      |   |                                             |      |   |
| <i>Mycobacterium abscessus</i> ATCC 19977                 | 5.09 | Y |                                             |      |   |
| <i>Mycobacterium africanum</i> GM041182                   | 4.39 | N |                                             |      |   |
| <i>Mycobacterium avium</i> 104                            | 5.48 | N |                                             |      |   |
| <i>Mycobacterium bovis</i> BCG str. <i>Pasteur</i> 1173P2 | 4.37 | N |                                             |      |   |
| <i>Mycobacterium chubuense</i> NBB4                       | 6.34 | N |                                             |      |   |
| <i>Mycobacterium gilvum</i> PYR-GCK                       | 5.98 | N |                                             |      |   |
| <i>Mycobacterium massiliense</i> str. GO 06               | 5.07 | N |                                             |      |   |
| <i>Mycobacterium intracellulare</i> ATCC 13950            | 5.40 | Y |                                             |      |   |
| <i>Mycobacterium marinum</i> M                            | 6.64 | N |                                             |      |   |
| <i>Mycobacterium rhodesiae</i> NBB3                       | 6.42 | N |                                             |      |   |
| <i>Mycobacterium smegmatis</i> str. MC2 155               | 6.99 | N |                                             |      |   |
| <i>Mycobacterium tuberculosis</i> H37Rv                   | 4.41 | Y |                                             |      |   |
| <i>Mycobacterium ulcerans</i> Agy99                       | 5.81 | N |                                             |      |   |
| <i>Mycobacterium vanbaalenii</i> PYR-1                    | 6.49 | Y |                                             |      |   |

**Table S2** Taxonomic positions of the 17 genera for inter-species analyses.  
The genera grouped into the same family/order are in the same grid.

| Domain          | Phylum                | Order                         | Family                         | Genus                     |
|-----------------|-----------------------|-------------------------------|--------------------------------|---------------------------|
| <i>Bacteria</i> | <i>Actinobacteria</i> | <i>Corynebacterineae</i>      | <i>Corynebacteriaceae</i>      | <i>Corynebacterium</i>    |
| <i>Bacteria</i> | <i>Actinobacteria</i> | <i>Corynebacterineae</i>      | <i>Mycobacteriaceae</i>        | <i>Mycobacterium</i>      |
| <i>Bacteria</i> | <i>Bacteroidetes</i>  | <i>Bacteroidales</i>          | <i>Bacteroidaceae</i>          | <i>Bacteroides</i>        |
| <i>Bacteria</i> | <i>Chlamydiae</i>     | <i>Chlamydiales</i>           | <i>Chlamydiaceae</i>           | <i>Chlamydia</i>          |
| <i>Bacteria</i> | <i>Firmicutes</i>     | <i>Bacillales</i>             | <i>Bacillaceae</i>             | <i>Bacillus</i>           |
| <i>Bacteria</i> | <i>Firmicutes</i>     | <i>Bacillales</i>             | <i>Staphylococcaceae</i>       | <i>Staphylococcus</i>     |
| <i>Bacteria</i> | <i>Firmicutes</i>     | <i>Lactobacillales</i>        | <i>Lactobacillaceae</i>        | <i>Lactobacillus</i>      |
| <i>Bacteria</i> | <i>Firmicutes</i>     | <i>Lactobacillales</i>        | <i>Leuconostocaceae</i>        | <i>Leuconostoc</i>        |
| <i>Bacteria</i> | <i>Firmicutes</i>     | <i>Lactobacillales</i>        | <i>Streptococcaceae</i>        | <i>Streptococcus</i>      |
| <i>Bacteria</i> | <i>Firmicutes</i>     | <i>Thermoanaerobacterales</i> | <i>Thermoanaerobacteraceae</i> | <i>Thermoanaerobacter</i> |
| <i>Bacteria</i> | <i>Proteobacteria</i> | <i>Alteromonadales</i>        | <i>Shewanellaceae</i>          | <i>Shewanella</i>         |
| <i>Bacteria</i> | <i>Proteobacteria</i> | <i>Campylobacterales</i>      | <i>Campylobacteraceae</i>      | <i>Campylobacter</i>      |
| <i>Bacteria</i> | <i>Proteobacteria</i> | <i>Campylobacterales</i>      | <i>Helicobacteraceae</i>       | <i>Helicobacter</i>       |
| <i>Bacteria</i> | <i>Proteobacteria</i> | <i>Pseudomonadales</i>        | <i>Pseudomonadaceae</i>        | <i>Pseudomonas</i>        |
| <i>Bacteria</i> | <i>Proteobacteria</i> | <i>Rhizobiales</i>            | <i>Bartonellaceae</i>          | <i>Bartonella</i>         |
| <i>Bacteria</i> | <i>Thermotogae</i>    | <i>Thermotogales</i>          | <i>Thermotogaceae</i>          | <i>Thermotoga</i>         |
| <i>Archaea</i>  | <i>Crenarchaeota</i>  | <i>Thermoproteales</i>        | <i>Thermoproteaceae</i>        | <i>Pyrobaculum</i>        |



**Table S3** List of the species analyzed in this study from the order *Clostridiales*.

| <i>Clostridium</i> Species                                          | Genome size (Mb) | Type strain | Species from different genera in the order <i>Clostridiales</i>        | Genome size (Mb) | Type species |
|---------------------------------------------------------------------|------------------|-------------|------------------------------------------------------------------------|------------------|--------------|
| <i>Clostridium acetobutylicum</i> ATCC 824                          | 4.13             | Y           | <i>Alkaliphilus oremlandii</i> OhILAs                                  | 3.12             | N            |
| <i>Clostridium acidurici</i> 9a                                     | 3.11             | N           | <i>Eubacterium rectale</i> ATCC 33656                                  | 3.45             | N            |
| <i>Clostridium beijerinckii</i> NCIMB 8052                          | 6.00             | N           | <i>Thermoanaerobacterium thermosaccharolyticum</i> DSM 571             | 2.79             | Y            |
| <i>Clostridium botulinum</i> A2 str. Kyoto                          | 4.16             | N           | <i>Mahella australiensis</i> 50-1 BON                                  | 3.14             | Y            |
| <i>Clostridium cellulolyticum</i> H10                               | 4.07             | Y           | <i>Roseburia hominis</i> A2-183                                        | 3.59             | N            |
| <i>Clostridium cellulovorans</i> 743B                               | 5.26             | Y           | <i>Desulfotobacterium dehalogenans</i> ATCC 51507                      | 4.32             | Y            |
| <i>Clostridium clariflavum</i> DSM 19732                            | 4.90             | Y           | <i>Oscillibacter valericigenes</i> Sjm18-20                            | 4.41             | Y            |
| <i>Clostridium kluyveri</i> DSM 555                                 | 3.96             | Y           | <i>Syntrophomonas wolfei</i> subsp. <i>wolfei</i> str. Goettingen G311 | 2.94             | Y            |
| <i>Clostridium lentocellum</i> DSM 5427                             | 4.71             | Y           | <i>Desulfotomaculum ruminis</i> DSM 2154                               | 3.97             | N            |
| <i>Clostridium ljungdahlii</i> DSM 13528                            | 4.63             | Y           | <i>Clostridium cellulovorans</i> 743B                                  | 5.26             | N            |
| <i>Clostridium novyi</i> NT                                         | 2.55             | N           |                                                                        |                  |              |
| <i>Clostridium pasteurianum</i> BC1                                 | 4.99             | N           |                                                                        |                  |              |
| <i>Clostridium perfringens</i> ATCC 13124                           | 3.26             | Y           |                                                                        |                  |              |
| <i>Clostridium phytofermentans</i> ISDg                             | 4.85             | Y           |                                                                        |                  |              |
| <i>Clostridium saccharobutylicum</i> DSM 13864                      | 5.11             | Y           |                                                                        |                  |              |
| <i>Clostridium saccharolyticum</i> WM1                              | 4.66             | Y           |                                                                        |                  |              |
| <i>Clostridium stercorarium</i> subsp. <i>stercorarium</i> DSM 8532 | 2.97             | Y           |                                                                        |                  |              |
| <i>Clostridium sticklandii</i>                                      | 2.72             | Y           |                                                                        |                  |              |

|                                                  |      |   |  |  |  |
|--------------------------------------------------|------|---|--|--|--|
| DSM 519                                          |      |   |  |  |  |
| <i>Clostridium thermocellum</i><br>ATCC 27405    | 3.84 | Y |  |  |  |
| <b><i>Desulfotomaculum</i> Species</b>           |      |   |  |  |  |
| <i>Desulfotomaculum acetoxidans</i> DSM 771      | 4.55 | Y |  |  |  |
| <i>Desulfotomaculum carboxydivorans</i> CO-1-SRB | 2.89 | Y |  |  |  |
| <i>Desulfotomaculum gibsoniae</i> DSM 7213       | 4.86 | Y |  |  |  |
| <i>Desulfotomaculum kuznetsovii</i> DSM 6115     | 3.60 | Y |  |  |  |
| <i>Desulfotomaculum reducens</i><br>MI-1         | 3.61 | N |  |  |  |
| <i>Desulfotomaculum ruminis</i><br>DSM 2154      | 3.97 | Y |  |  |  |
